# Supplementary material for: High-magnitude compression accelerates the premature senescence of nucleus pulposus cells via the p38 MAPK-ROS pathway
Source: PubMed Central journal article supplement (PMC5604423; doi:10.1186/s13075-017-1384-z), 2017-09-18

**Additional file 1.** Identification of nucleus pulposus (NP) cells. A: NP cells under a light microscope. NP cells exhibited short shuttle-like, round or polygon shapes. Magnification: 200x. B: Analysis of gene expression of NP cell specific markers (CAXII, Keratin-19, FOXF1 and PAX1).

**A**

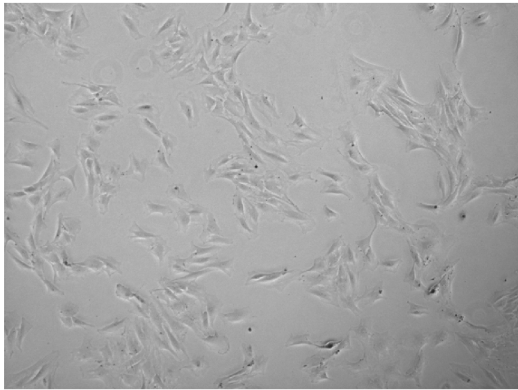

**B**

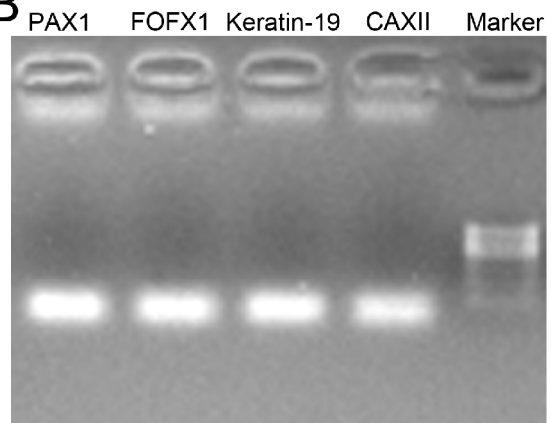

Supplement: 13075_2017_1384_MOESM1_ESM.pdf [file 13075_2017_1384_MOESM1_ESM.pdf]
