# Supplementary material for: High-magnitude compression accelerates the premature senescence of nucleus pulposus cells via the p38 MAPK-ROS pathway
Source: Springer Nature journal article supplement (doi:10.1186/s13075-017-1384-z), 2017-09-18

**Additional file 2.** Analysis of the percentage of dying nucleus pulposus (NP) cells in each group. The flow cytometry assay showed that the percentage of dying NP cells in the 20% deformation compression group (22.17%) increased compared with the 2% deformation compression group (4.31%) and the control group (3.55%). However, treatment with the ROS scavenger NAC and the p38 MAPK inhibitor SB203580 decreased 20% deformation compression-induced NP cell apoptosis (from 22.17% to 16.83% and from 22.17% to 11.65%, respectively).

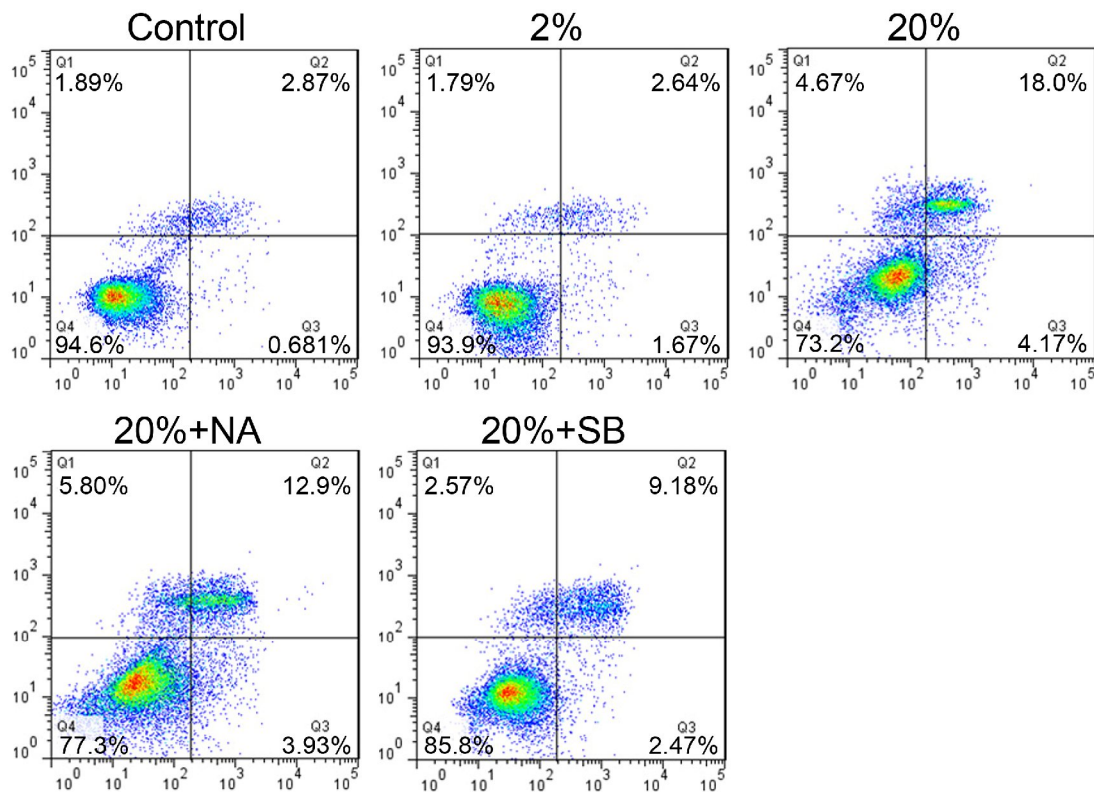

Supplement: MOESM2 [file 15068998]
